# Supplementary material for: Novel method for the fabrication of ultrathin, free-standing and porous polymer membranes for retinal tissue engineering
Source: Royal Society of Chemistry journal article supplement (doi:10.1039/c7tb00376e), 2017-01-01
Supplement: c7tb00376e1.pdf [file c7tb00376e1.pdf]

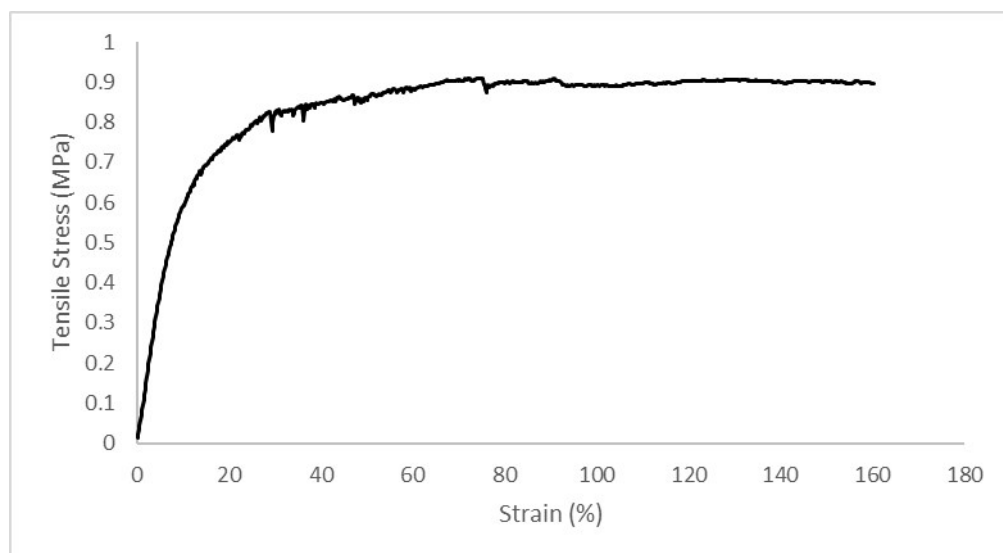

Figure S1: Stress-strain curve of PCL membrane

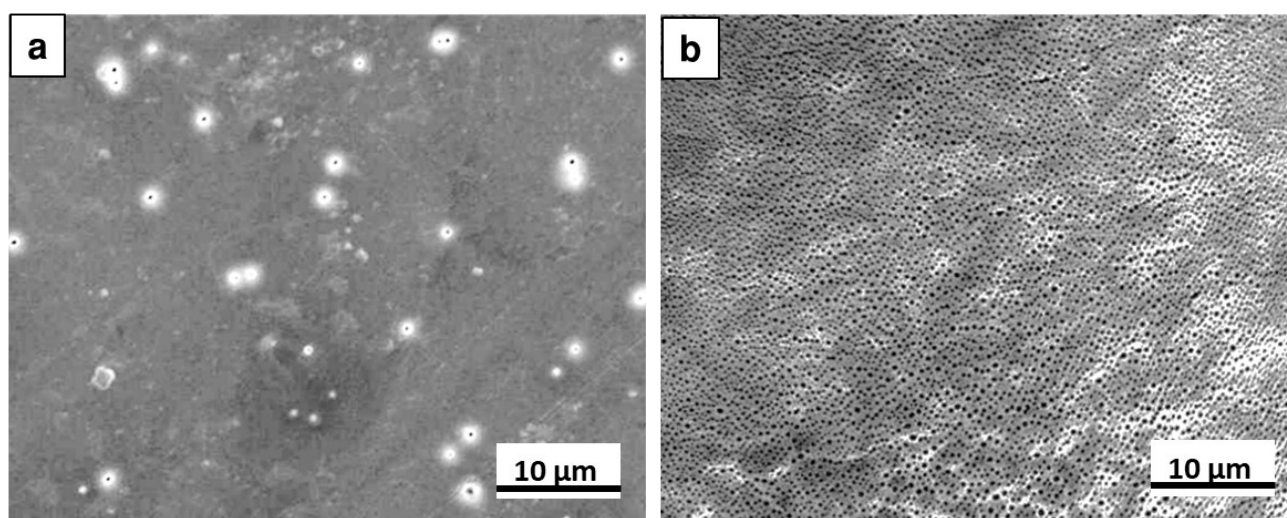

Figure S2: comparison between (a) commercial PET cell insert and (b) PCL membrane
